# Supplementary material for: Multimorbidity and Frailty Are the Key Characteristics of Patients Hospitalized with COVID-19 Breakthrough Infection during Delta Variant Predominance in Italy: A Retrospective Study
Source: MDPI journal article supplement (doi:10.3390/jcm11185442), 2022-09-16
Supplement: s1 [file s1]

# SUPPLEMENTARY TABLE S1

Comparison of the clinical characteristics and outcomes of patients with COVID-19 breakthrough infection, categorized according to the clinical priority of COVID-19 symptoms.

|                                             | Asymptomatic<br>N.38<br>(1) | Paucisymptomatic<br>N. 69<br>(2) | Symptomatic<br>N.122<br>(3) | p      | P*     | P<0.05                        |
|---------------------------------------------|-----------------------------|----------------------------------|-----------------------------|--------|--------|-------------------------------|
| <b>Demography and personal history</b>      |                             |                                  |                             |        |        |                               |
| Age, years                                  | 83 (73-89)                  | 86 (81-90)                       | 78 (70-83)                  | <0.001 | -      |                               |
| Female sex, %                               | 61                          | 52                               | 38                          | 0.023  | -      |                               |
| Chronic illnesses, number                   | 4 (2-7)                     | 5 (4-7)                          | 4 (3-6)                     | 0.020  | 0.270  |                               |
| CFS score                                   | 6 (4-7)                     | 6 (5-7)                          | 4 (3-6)                     | <0.001 | 0.002  |                               |
| Hypertension, %                             | 55                          | 59                               | 65                          | 0.524  | 0.174  |                               |
| Cardiac disease, %                          | 53                          | 51                               | 46                          | 0.696  | 0.705  |                               |
| Diabetes, %                                 | 21                          | 20                               | 16                          | 0.716  | 0.768  |                               |
| Obesity, %                                  | 11                          | 4                                | 16                          | 0.064  | 0.143  |                               |
| Dyslipidemia, %                             | 21                          | 16                               | 21                          | 0.652  | 0.536  |                               |
| CKD, %                                      | 13                          | 17                               | 11                          | 0.421  | 0.767  |                               |
| Cancer, %                                   | 3                           | 7                                | 6                           | 0.631  | 0.655  |                               |
| Dementia, %                                 | 29                          | 36                               | 21                          | 0.084  | 0.929  |                               |
| CIRS-CS                                     | 10 (6-15)                   | 13 (10-17)                       | 11 (6-16)                   | 0.042  | 0.617  |                               |
| CIRS-SI                                     | 2 (1-3)                     | 3 (2-4)                          | 2 (1-3)                     | 0.030  | 0.698  |                               |
| <b>Vaccination anti-SARS-CoV-2</b>          |                             |                                  |                             |        |        |                               |
| Doses of vaccine received, n                | 2 (2-2)                     | 2 (2-2)                          | 2 (2-2)                     | 0.899  | 0.758  |                               |
| 3 vaccine doses received, %                 | 11                          | 10                               | 11                          | 0.957  | 0.784  |                               |
| Time from last vaccine, days                | 182 (88-220)                | 172 (104-217)                    | 182 (104-232)               | 0.588  | 0.213  |                               |
| <b>Clinical presentation upon admission</b> |                             |                                  |                             |        |        |                               |
| PaO <sub>2</sub> /FiO <sub>2</sub> , mmHg   | 374 (333-408)               | 319 (276-374)                    | 298 (262-343)               | <0.001 | <0.001 | (1) vs (2) vs (3); (2) vs (3) |
| Duration of symptoms, days                  | 1 (0-5)                     | 2 (1-4)                          | 5 (3-7)                     | <0.001 | <0.001 | (3) vs (1) vs (2)             |
| Fever, %                                    | 8                           | 38                               | 76                          | <0.001 | <0.001 | (1) vs (2) vs (3); (2) vs (3) |
| Cough, %                                    | 0                           | 28                               | 47                          | <0.001 | <0.001 | (1) vs (2) vs (3); (2) vs (3) |
| Dyspnea,%                                   | 3                           | 48                               | 54                          | 0.001  | <0.001 | (1) vs (2) vs (3); (2) vs (3) |
| Chest CT positive for COVID-19, %           | 0                           | 25                               | 99                          | <0.001 | <0.001 | (1) vs (2) vs (3); (2) vs (3) |
| <b>Blood tests on admission</b>             |                             |                                  |                             |        |        |                               |
| Haemoglobin, g/dl                           | 11.5 (10.5-13.1)            | 11.6 (10.7-13.0)                 | 13.6 (12.1-14.4)            | <0.001 | <0.001 | (3) vs (1) vs (2)             |
| Platelet count, 1000/mm <sup>3</sup>        | 218 (189-265)               | 189 (131-270)                    | 184 (155-243)               | 0.049  | 0.092  |                               |
| Neutrophil count, n/mm <sup>3</sup>         | 5039 (2878-6785)            | 4437 (3244-7582)                 | 4740 (3358-7874)            | 0.508  | 0.308  |                               |

|                                     |                  |                  |                  |                  |                  |                               |
|-------------------------------------|------------------|------------------|------------------|------------------|------------------|-------------------------------|
| Lymphocyte count, n/mm <sup>3</sup> | 1130 (794-1767)  | 1012 (769-1520)  | 866 (606-1333)   | <b>0.013</b>     | <b>0.001</b>     | (3) vs (1) vs (2)             |
| Creatinine, mg/dl                   | 0.7 (0.6-1.1)    | 0.9 (0.7-1.4)    | 1.0 (0.8-1.3)    | 0.050            | 0.059            |                               |
| C-reactive protein, mg/L            | 28 (13-52)       | 51 (21-91)       | 75 (39-131)      | <b>&lt;0.001</b> | <b>&lt;0.001</b> | (1) vs (2) vs (3); (2) vs (3) |
| Procalcitonin, ng/ml                | 0.08 (0.05-0.12) | 0.11 (0.07-0.36) | 0.13 (0.07-0.40) | <b>0.007</b>     | <b>0.004</b>     | (1) vs (3)                    |
| D-dimer, ng/ml                      | 1345 (603-3596)  | 1105 (421-2004)  | 692 (432-1240)   | <b>0.007</b>     | 0.062            |                               |
| CPK, IU/L                           | 80 (45-207)      | 100 (44-219)     | 115 (69-252)     | 0.084            | 0.238            |                               |
| LDH, IU/L                           | 215 (174-266)    | 211 (175-251)    | 275 (220-346)    | <b>&lt;0.001</b> | <b>&lt;0.001</b> | (3) vs (1) vs (2)             |
| AST, IU/L                           | 26 (18-35)       | 25 (20-36)       | 33 (26-55)       | <b>&lt;0.001</b> | <b>0.001</b>     | (3) vs (1) vs (2)             |
| <b>Clinical course and outcome</b>  |                  |                  |                  |                  |                  |                               |
| NIV, %                              | 0                | 8                | 28               | <b>&lt;0.001</b> | <b>&lt;0.001</b> | (3) vs (1) vs (2)             |
| IV, %                               | 0                | 0                | 4                | 0.113            | 0.197            |                               |
| Hospital death, %                   | 16               | 29               | 26               | 0.316            | 0.087            |                               |
| Time before RT-PCR negative, days   | 7 (7-19)         | 16 (8-23)        | 20 (11-28)       | <b>0.015</b>     | <b>0.007</b>     | (1) vs (3)                    |
| Hospital stay, days                 | 12 (7-22)        | 16 (10-24)       | 16 (8-28)        | 0.279            | 0.122            |                               |

CFS=Clinical Frailty Scale; CKD=Chronic Kidney Disease; CIRS-CS=Cumulative Illness Rating Scale-Comorbidity Score; CIRS-SI=Cumulative Illness Rating Scale-Severity Index; CT=Computed Tomography; CPK=Creatine Phosphokinase; LDH=Lactate Dehydrogenase; AST=Aspartate Aminotransferase; NIV=Non-Invasive Ventilation; IV=Invasive mechanical Ventilation; RT-PCR=Reverse-Transcriptase Polymerase-Chain Reaction. Data are expressed as median and interquartile range or percentage, as appropriate. P calculated with Kruskal-Wallis test, with significance values adapted basing on Bonferroni correction for multiple testing or logistic regression. \*P adjusted for age and sex with Quade non-parametric Ancova or logistic regression, where appropriated. P values <0.05 are indicated in bold.
